# Supplementary material for: Assessing floods and droughts in the Mékrou River basin (West Africa): a combined household survey and climatic trends analysis approach
Source: Copernicus journal article supplement (doi:10.5194/nhess-18-1279-2018), 2018-05-02

Supplement of Nat. Hazards Earth Syst. Sci., 18, 1279–1296, 2018  
<https://doi.org/10.5194/nhess-18-1279-2018-supplement>  
© Author(s) 2018. This work is distributed under  
the Creative Commons Attribution 3.0 License.

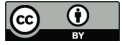

*Supplement of*

## **Assessing floods and droughts in the Mékrou River basin (West Africa): a combined household survey and climatic trends analysis approach**

**Vasileios Markantonis et al.**

*Correspondence to:* Vasileios Markantonis (vmarkantonis@gmail.com)

The copyright of individual parts of the supplement might differ from the CC BY 3.0 License.

### Supplementing Material

S1. Figure 6: Mean Annual Precipitation, Standard Deviation and Coefficient of Variation (%) of the entire time series available (CHIRPS 1981-2016), in the Mékrou river basin.

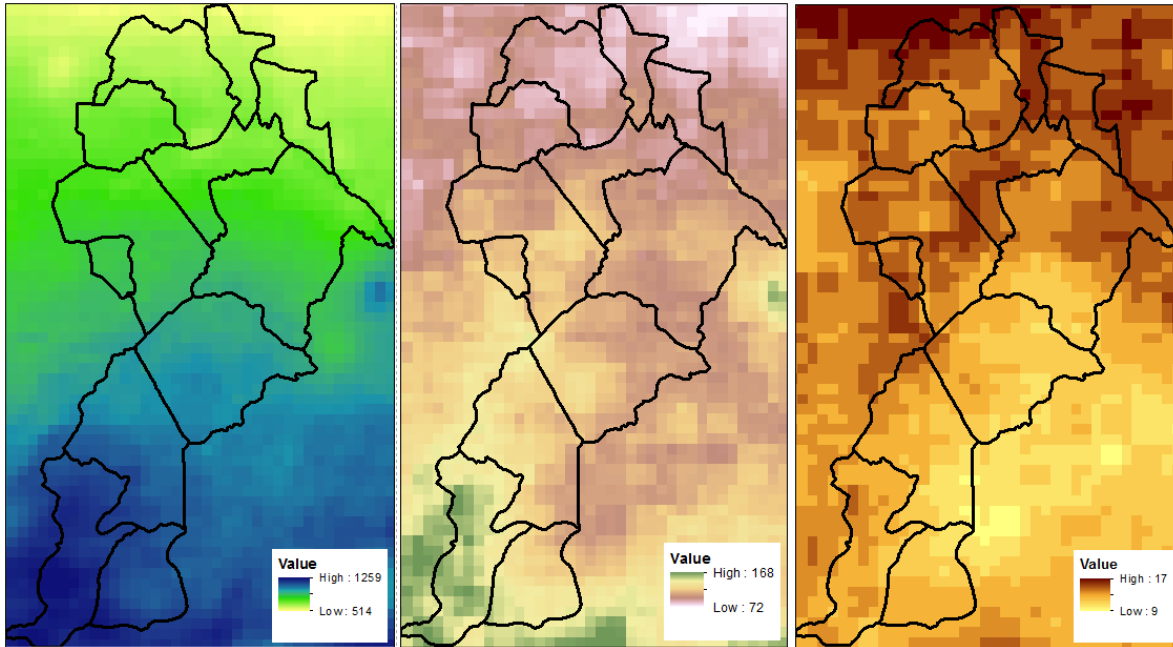

S2. Figure 7: Number of Wet/Dry events per administrative area and SPI type.

|           | SPI-3 |   |     |   | SPI-6    |   |     |   |   | SPI-3    |   |     |   | SPI-6 |  |     |  |              |  |  |  |  |  |
|-----------|-------|---|-----|---|----------|---|-----|---|---|----------|---|-----|---|-------|--|-----|--|--------------|--|--|--|--|--|
|           | W.e   |   | D.e |   | W.e      |   | D.e |   |   | W.e      |   | D.e |   | W.e   |  | D.e |  |              |  |  |  |  |  |
|           | Benin |   |     |   |          |   |     |   |   | Niger    |   |     |   |       |  |     |  | Burkina Faso |  |  |  |  |  |
| Kouandé   | 2     | 1 | 3   | 2 | Park W   | 1 | 0   | 0 | 1 | Tansarga | 1 | 0   | 1 | 0     |  |     |  |              |  |  |  |  |  |
| Pehúnco   | 2     | 2 | 2   | 2 | Tamou    | 2 | 2   | 0 | 2 | Diapaga  | 1 | 0   | 1 | 1     |  |     |  |              |  |  |  |  |  |
| Kérou     | 2     | 1 | 2   | 1 | Kirtachi | 1 | 2   | 0 | 2 | Bottou   | 2 | 0   | 0 | 1     |  |     |  |              |  |  |  |  |  |
| Banikoara | 1     | 3 | 2   | 2 | Falmey   | 2 | 2   | 2 | 2 |          |   |     |   |       |  |     |  |              |  |  |  |  |  |
| Karimama  | 1     | 2 | 1   | 1 | Falmey   | 2 | 2   | 2 | 2 |          |   |     |   |       |  |     |  |              |  |  |  |  |  |

S3. Figure 8: Temporal profile of SPI-3 (JJA) and SPI-6 (AMJJAS). Area percentage per administrative unit affected by different anomaly categories

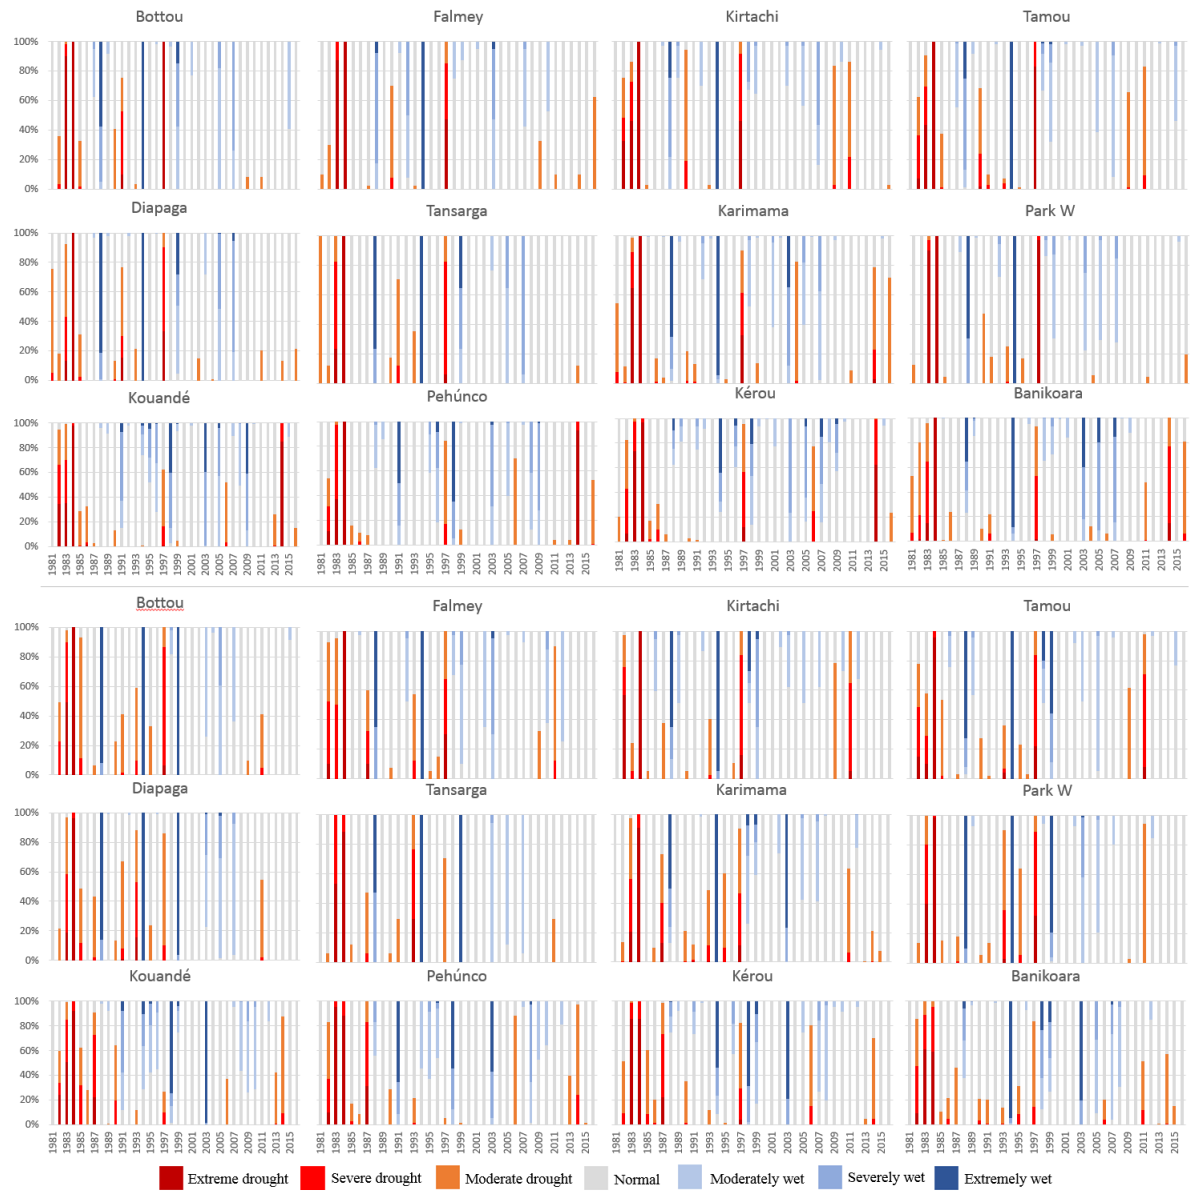

S4: Figure 9: Mean Heat Wave Magnitude Index for the entire Area of Influence and 5-year moving average.

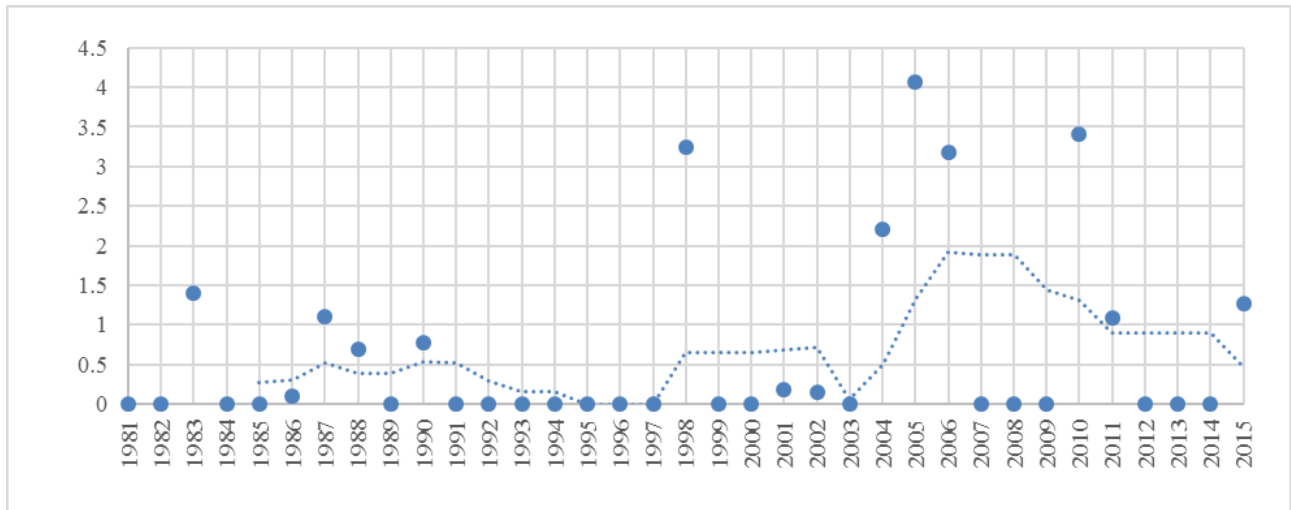

S5: Figure 10: Temporal profile of Heat Wave Magnitude Index per Administrative Area

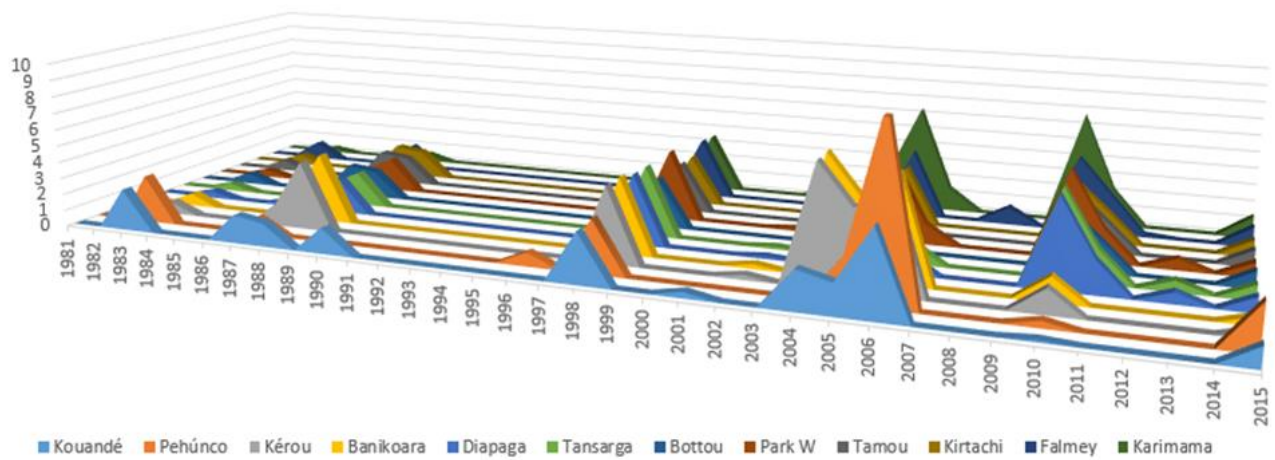

S6. Figure 11: Monthly average discharge at Barou station as modelled in SWAT for the period 1998-2012; in blue the average; dashed red line is cumulated flow in cubic meter.

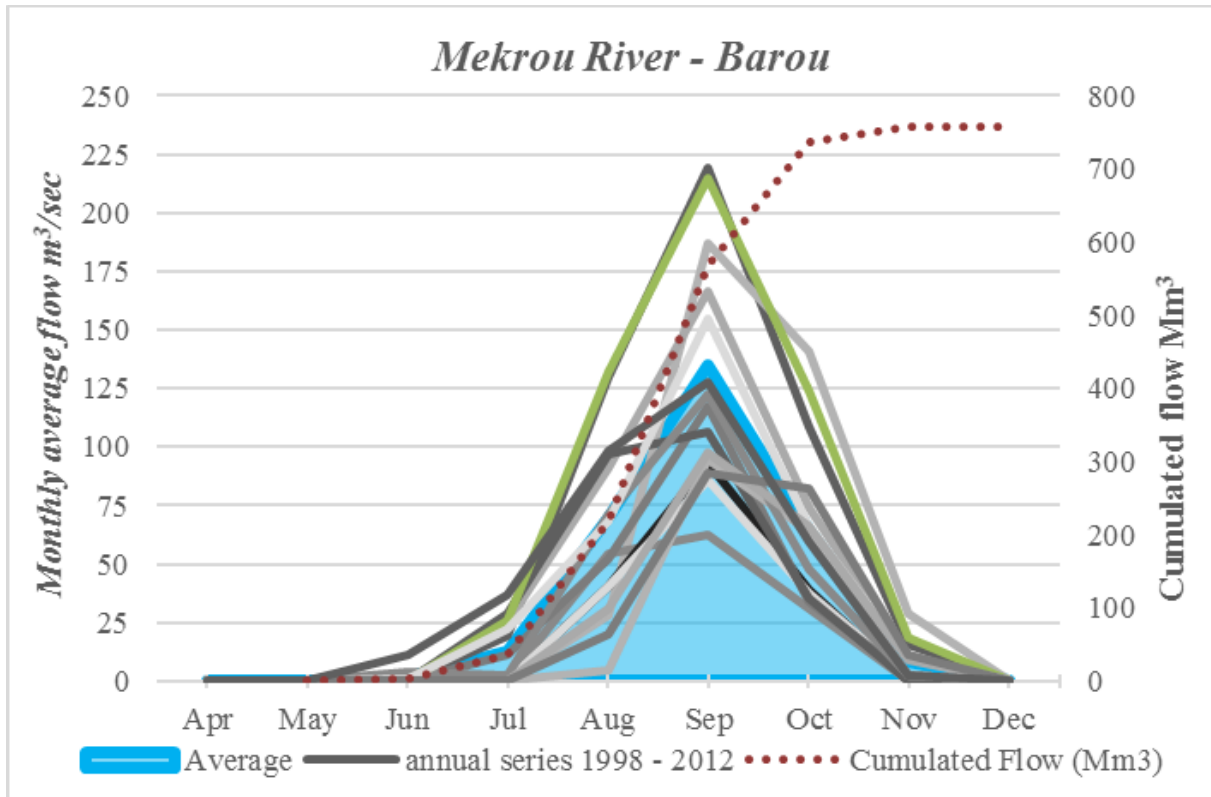

S7. Figure 12: Annual water flow (Mm3) in several subbasin in the Mekrou.

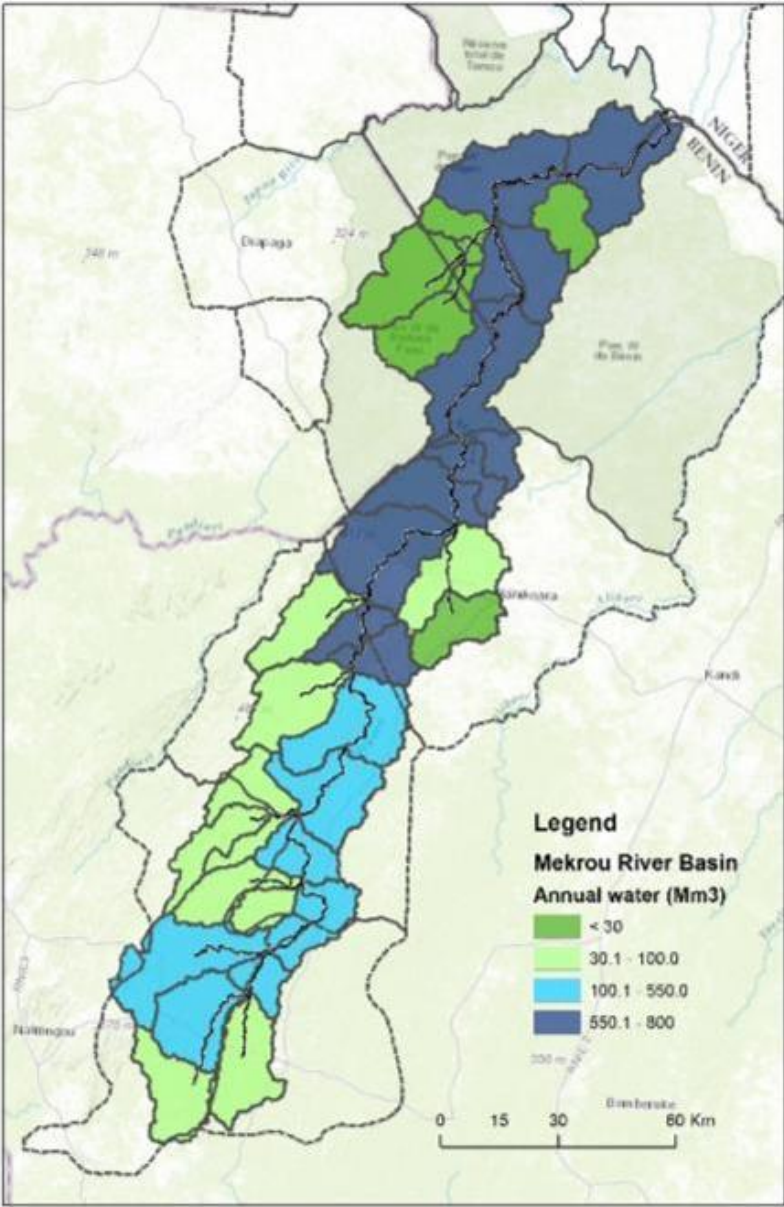

Supplement: Supplementary file 1 [file nhess-18-1279-2018-supplement.pdf]
